# Supplementary material for: L-Arginine supplementation as mitochondrial therapy in diabetic cardiomyopathy
Source: Springer Nature journal article supplement (doi:10.1186/s12933-024-02490-x), 2024-12-20
Supplement: MOESM1 [file 12933_2024_2490_MOESM1_ESM.pdf]

**A**

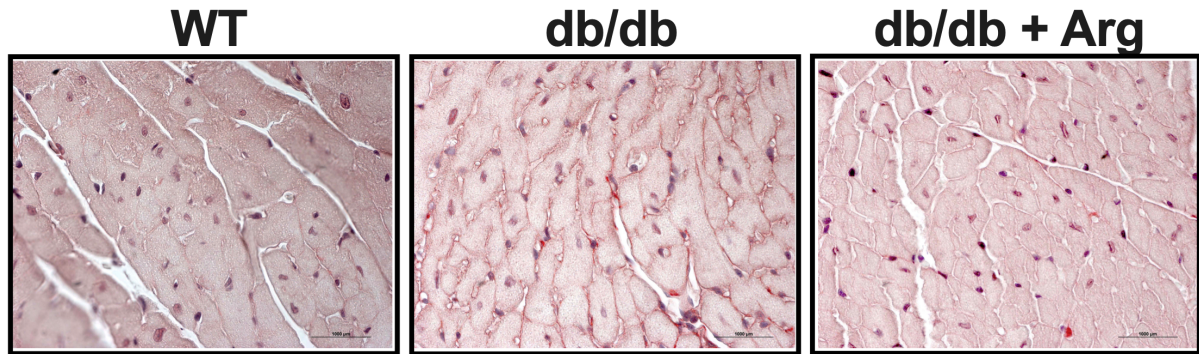

**B**

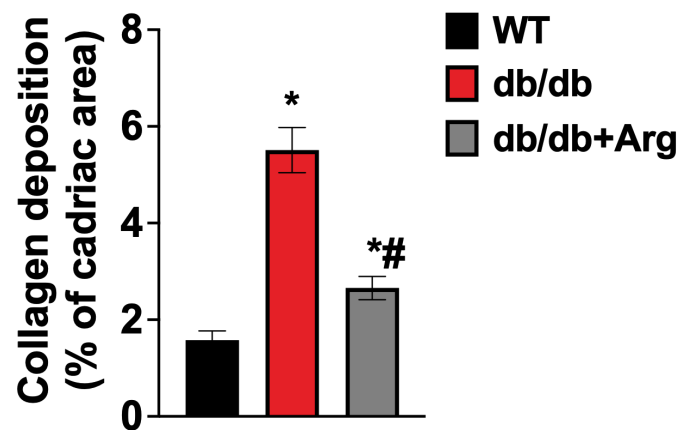

**Figure S1.**

Representative Picrosirius Red staining for collagen deposition in the left ventricle; dimensional bar: 1000  $\mu$ m. (A). Quantitative data for total collagen deposition (B). \* $p < 0.05$  vs WT, #  $p < 0.05$  vs db/db.

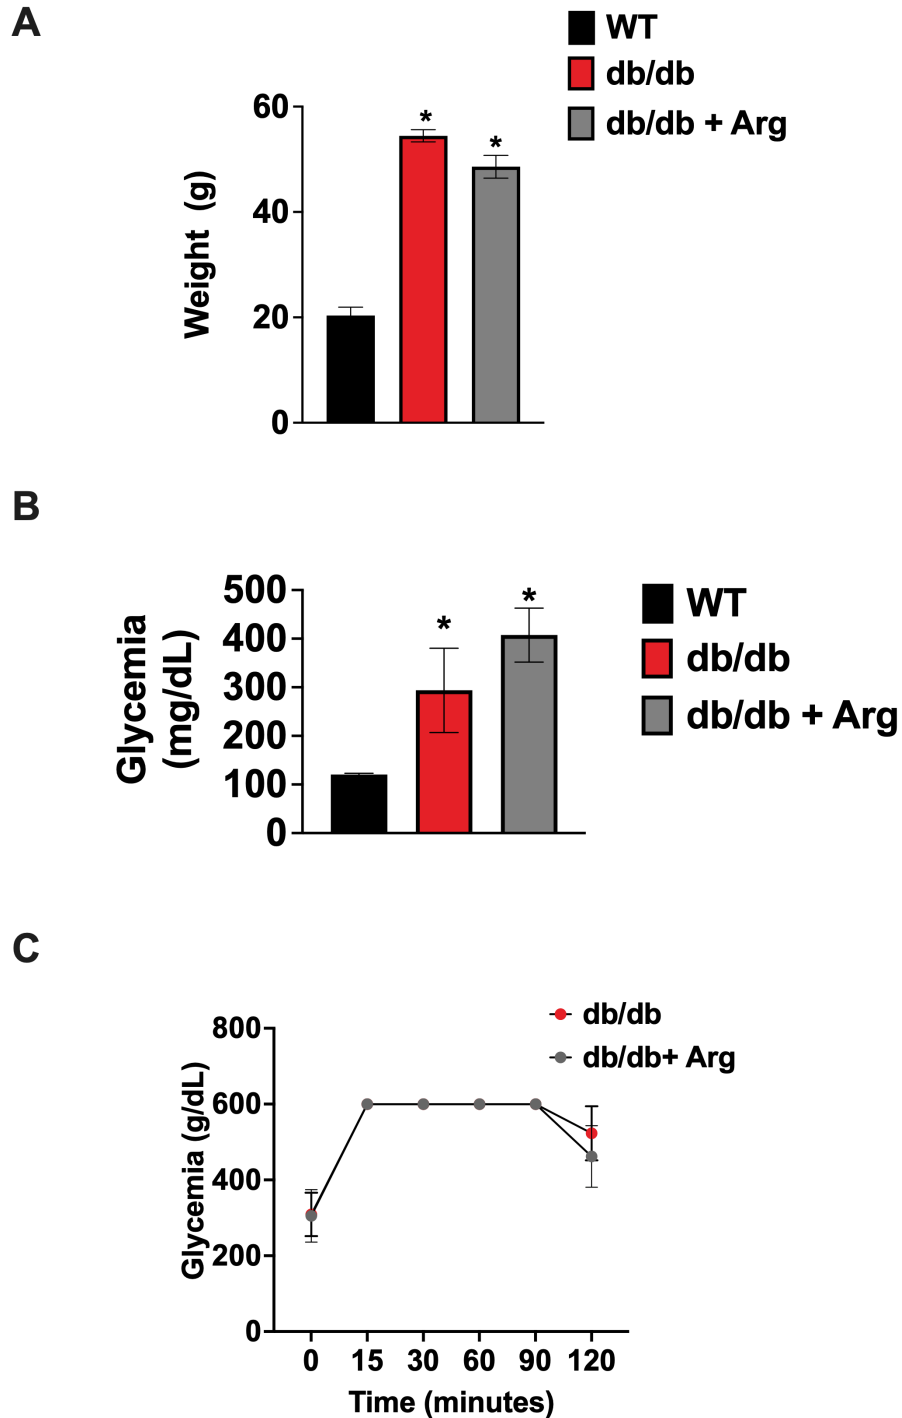

**Figure S2.**

Evaluation of diabetes-related phenotypes at end-point. Body weight (A), glycemia (B), glucose tolerance test at the indicated time points (C). ANOVA followed by Bonferroni correction was used to assess the significant differences among groups (WT, db/db, db/db + Arg; n=4). \*p<0.05 vs WT, # p<0.05 vs db/db.

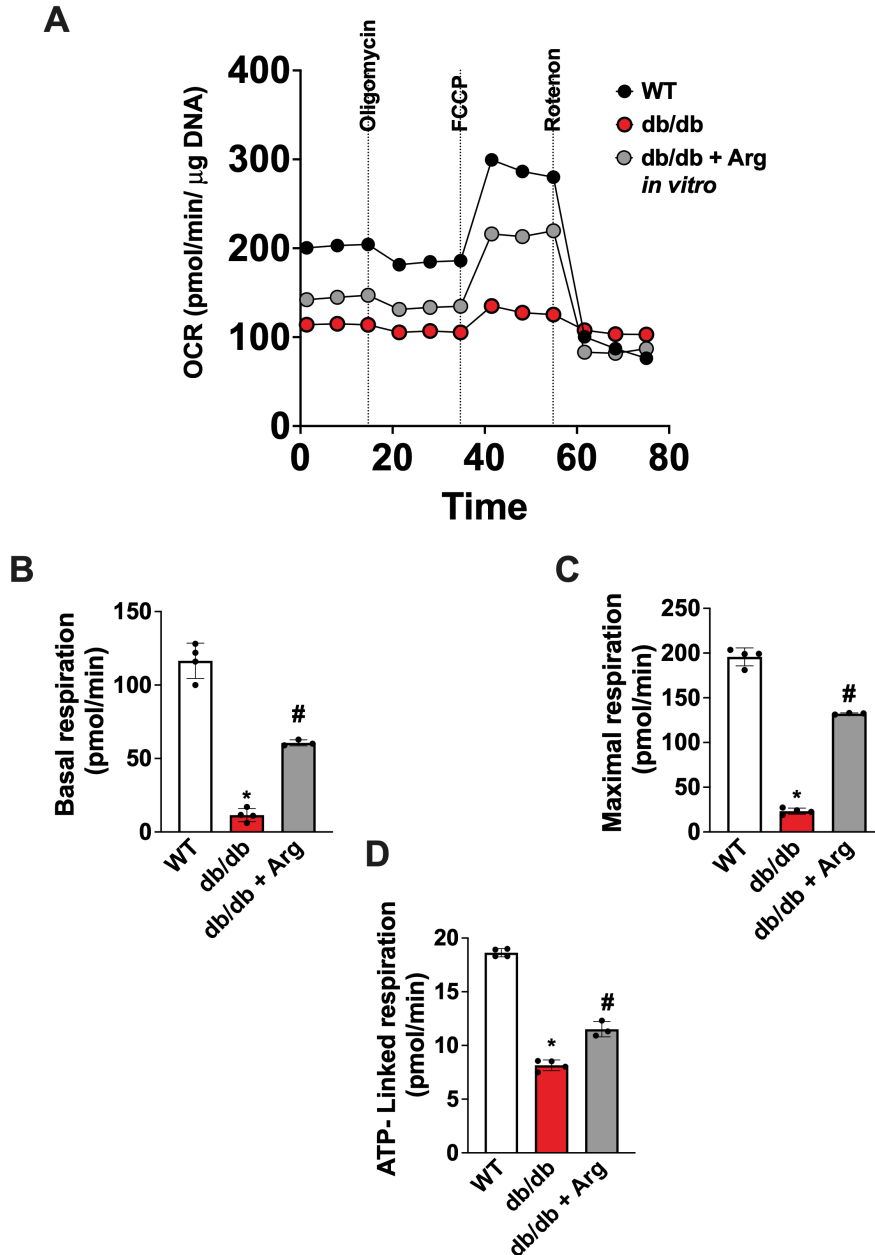

**Figure S3**

Adult left ventricular myocytes were isolated from WT and db/db mice. Immediately after attachment (1 hour), Arg was directly added to cell medium (50  $\mu$ M) when indicated (Arg *in vitro*). The day after, oxygen consumption rate (OCR) was determined by Seahorse, in basal conditions and in response to Oligomycin, FCCP, and Rotenone (A). Basal (B) and maximal respiration rate (C), alongside ATP-coupled respiration (D) were determined. ANOVA followed by Bonferroni correction was used to assess the significative differences among groups (WT, db/db n=4, db/db + Arg *in vitro* n=3). \*p<0.05 vs WT, # p<0.05 vs db/db.

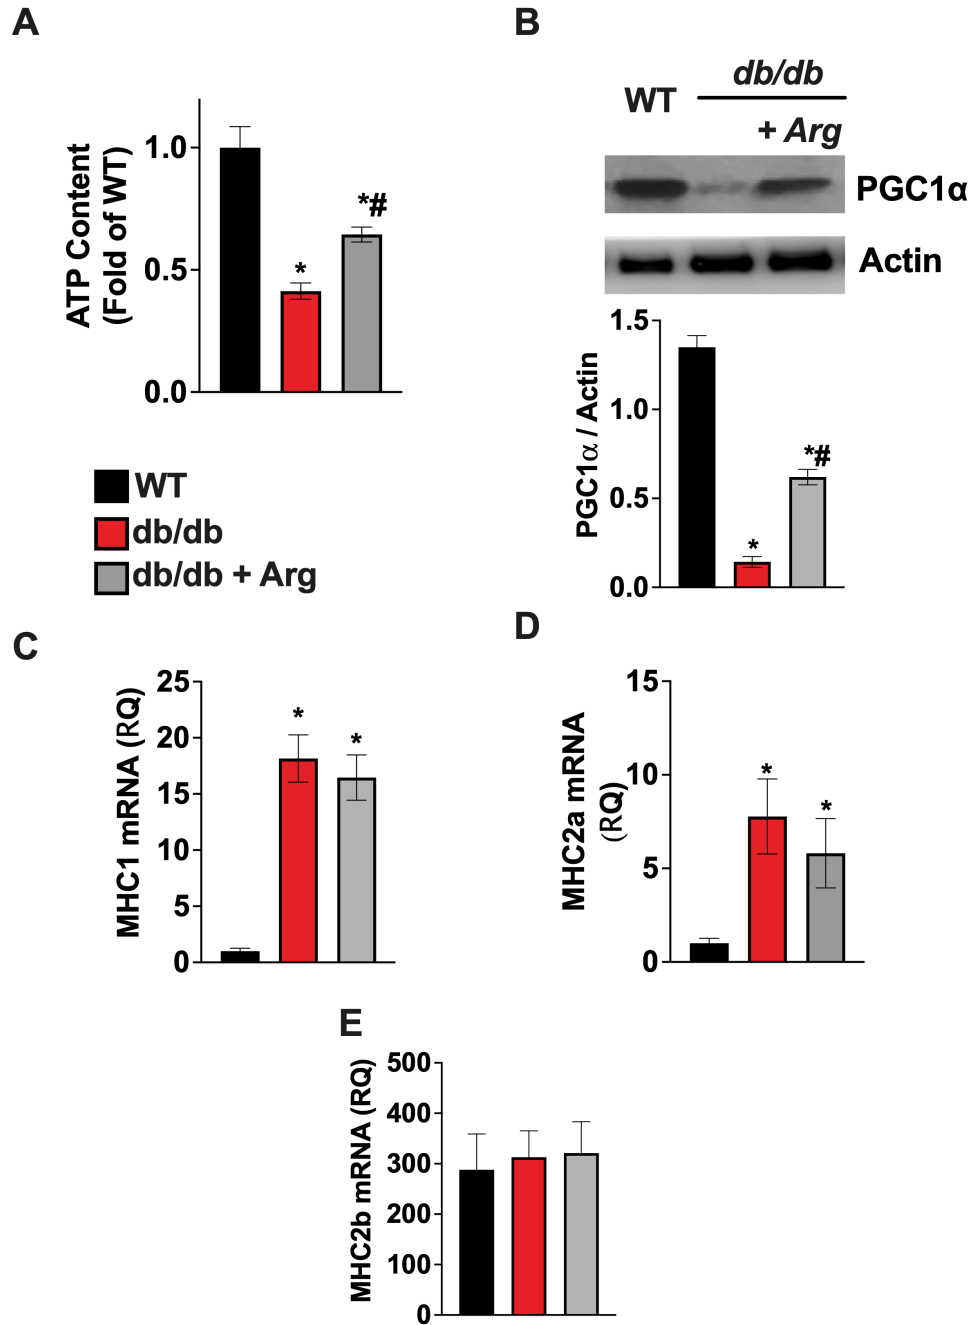

**Figure S4**

ATP content was determined in skeletal muscle lysate and expressed as fold of control (A). Western blot analysis on whole muscle lysate for PGC1α detection. GAPDH was used as loading control (B). In order to assess muscle fibres transition, Real-time PCR for mRNAs of Myosin isoforms MHC1, MHC2a, MHC2b, (C-E) was conducted. The images are representative of at least 3 independent experiments. ANOVA followed by Bonferroni correction was used to assess the significant differences among groups (WT, db/db, db/db + Arg n=4). \*p<0.05 vs WT, # p<0.05 vs db/db.
